# Supplementary material
Source: PubMed Central journal article supplement (PMC4205604)
Supplement: pnas.201407808SI.pdf [file pnas.201407808SI.pdf]

# Supporting Information

Liang et al. 10.1073/pnas.1407808111

## SI Text

**Preparation and Characterization of H-Ferritin and Doxorubicin-Loaded H-Ferritin.** Human heavy-chain ferritin (HF<sub>n</sub>) was produced in *Escherichia coli* and purified as previously described (1). The loading of doxorubicin (Dox) into the cavity of HF<sub>n</sub> was carried out in the following procedures. Briefly, HF<sub>n</sub> at 1 mg/mL was dissolved in 8 M urea (Sinopharm Chemical Reagent Co., Ltd.) and gently vortexed for 30 min at room temperature to ensure complete dissociation. The Dox (Sangon Biotech) was then added into the solution with a final concentration of 1 mg/mL. After incubation for 10 min in the dark, the mixture was transferred to dialysis bags (molecular weight cut-off 3,000 Da; Thermo Scientific) and dialyzed against gradient concentrations of urea buffer (7, 5, 3, 2, 1, and 0 M, each for 4 h) containing 1 mg/mL of Dox at 4 °C to slowly reassemble HF<sub>n</sub> protein cages. The resulting solution was then dialyzed against saline overnight to remove the free Dox. The final prepared Dox-containing HF<sub>n</sub> (HF<sub>n</sub>-Dox) was analyzed on a Superdex 200 10/300 GL column (GE Healthcare) connected to a size-exclusion chromatography (SEC) system (Amersham Pharmacia Biotech). The results showed a single absorbance peak in the UV trace at 280 nm (HF<sub>n</sub> protein cage) corresponding to a single absorbance peak in the visible at 485 nm (Dox) (Fig. S1A), demonstrating the successful loading of Dox into the HF<sub>n</sub> nanocage. The Dox concentration was determined by measuring the absorbance at 485 nm and the concentration of HF<sub>n</sub> was determined using a Bradford assay kit (Bio-Rad). The Dox:HF<sub>n</sub> molar ratio was calculated to be 33.1:1.

The prepared HF<sub>n</sub>-Dox nanoparticles were further characterized using cryoelectron transmission microscopy (cryo-EM), dynamic light scattering (DLS), and CD. For cryo-EM observation, an aliquot of 3.5 μL purified HF<sub>n</sub>-Dox or HF<sub>n</sub> samples was applied to a holey grid and frozen by FEI Vitrobot. The cryo samples were imaged in an FEI 300-kV Titan Krios electron microscope (FEI) operated at 300 kV with a Gatan UltraScan4000 (model 895) CCD camera at the magnification of 96,000 and dose of 20–25 e<sup>-</sup>/Å<sup>2</sup>. DLS was used to measure the particle radius of HF<sub>n</sub> and HF<sub>n</sub>-Dox using a DynaPro Titan system DLS instrument (Wyatt Technology). The analysis was performed at 25 °C and the concentration of the samples used was 0.25 mg/mL in PBS buffer. CD spectra were performed on a Chirascan-plus CD Spectrometer (Applied Photophysics) at 25 °C. The sample concentrations used were 0.25 mg/mL in PBS buffer. The spectra were measured from 260 to 200 nm with 0.1-nm resolution in a quartz cell with a 1-cm path length.

**In Vitro Drug Release Studies.** To assay for the release of Dox, HF<sub>n</sub>-Dox samples (500 μM Dox equivalents, 500 μL) were placed in a D-tube (molecular weight cut-off 6–8 kDa, D-Tube Dialyzer midi; Novagen) and incubated with gentle stirring in either PBS buffer (0.1 M, pH 7.4) or acetate buffer (0.1 M, pH 5.0) at 37 °C in the dark. The released free Dox at different incubation times was determined by HPLC (Shimadzu Scientific Instruments) with a C18 column. HF<sub>n</sub>-Dox was incubated with normal mouse serum (ImmunoReagents, Inc.) for HF<sub>n</sub>-Dox nanoparticle stability evaluation.

**Antibody Blocking Assay.** An antibody blocking assay was performed to confirm that transferrin receptor 1 (TfR1) is the binding receptor of HF<sub>n</sub>-Dox to tumor cells. Briefly, 1 μM of HF<sub>n</sub>-Dox was incubated with HT-29 cancer cells in the presence or absence of a 10-fold molar excess of anti-TfR1 mAbs (clone M-A712; BD

Bioscience). After incubation for 1 h at 37 °C, the cells were washed in cold PBS and examined under a confocal laser scanning microscope (Olympus) to observe the fluorescence signal of Dox.

**Pharmacokinetics Study.** To determine the pharmacokinetics, HF<sub>n</sub>-Dox [10 mg/kg body weight (BW), Dox equivalents], or free Dox (10 mg/kg BW) was i.v. injected into BALB/c healthy mice (*n* = 6 for each group). At various times after injection blood was collected from the tail vein and the plasma was separated and analyzed for Dox concentration by the following procedure. Briefly, the obtained plasma samples (10 μL) were incubated with 490 μL of acidified isopropanol (0.75 M HCl in isopropanol) overnight at –20 °C in the dark to extract Dox. The mixture was then centrifuged at 15,000 × *g* for 20 min and the supernatant was loaded onto a 96-well plate (Corning). Dox concentration was determined by measuring the fluorescence at 485 nm excitation and 590 nm emission, using a Varioskan Flash Spectral Scanning Multimode Reader (ThermoFisher Scientific). To correct for nonspecific background, the fluorescence of blood samples from untreated mice was determined. After deducting the nonspecific fluorescence, the Dox concentration of blood samples was quantified by comparing to a linear standard curve that was created between the fluorescence values and standard Dox concentration from 1 to 3,000 nM.

**Biodistribution Study.** Female BALB/c mice bearing HT-29 tumors were injected with HF<sub>n</sub>-Dox (10 mg/kg BW, Dox equivalents), Doxil (10 mg/kg BW, Dox equivalents), or free Dox (10 mg/kg BW) via tail vein to quantify Dox tissue distribution. At 1, 4, and 24 h postinjection, mice were killed. Tumors and the major tissues were collected, weighed, and homogenized with an addition of 1:10 (wt/vol) acidified isopropanol in a tissue homogenizer on ice and extracted overnight at –20 °C in the dark. All homogenate samples were then centrifuged at 4 °C for 10 min at 18,000 × *g*. The supernatant was removed and the fluorescence intensity was measured by a Varioskan Flash Spectral Scanning Multimode Reader. The tissue autofluorescence was corrected by subtracting the background fluorescence of tissues from untreated control mice. The remaining fluorescence values were then converted to drug concentration using the Dox fluorescence standard curve as described above. The results were presented as percentage of injected dose (%ID) per gram of tissue. Values are expressed as means ± SD for a group of four animals (*n* = 4 per group).

**Clearance Study.** To evaluate the total body clearance, a volume of 200 μL of HF<sub>n</sub>-Dox (10 mg/kg BW, Dox equivalents) or free Dox (10 mg/kg BW) was administered i.v. into healthy or HT-29 tumor-bearing (~500 mm<sup>3</sup> in volume) BALB/c mice. Mice were housed in special cages to allow for the collection of urine and feces. At 96 h postinjection, mice were killed and the Dox contents in urine or feces were measured by the fluorescence assay, as described for the biodistribution study. The major organs from the remaining carcasses were excised and homogenized. Dox was extracted by acidified isopropanol and quantified by fluorescence assay as described above. The retained Dox in the carcass was determined by adding all of the Dox contents in the major organs together.

**Tolerability of HF<sub>n</sub>-Dox in Healthy Mice.** Forty-two female BALB/c healthy mice (6–8 wk of age) were randomly assigned to one of the following seven treatment groups (*n* = 6 per group): PBS, free Dox (5 mg/kg BW), free Dox (10 mg/kg BW), free HF<sub>n</sub> nanocage (480 mg/kg BW, a dose of free HF<sub>n</sub> equivalent to the 20 mg/kg Dox dose), HF<sub>n</sub>-Dox (5 mg/kg BW, Dox equivalents), HF<sub>n</sub>-Dox (10 mg/kg BW, Dox equivalents), or HF<sub>n</sub>-Dox (20 mg/kg
